# Supplementary material for: Altered lipid composition in Streptococcus pneumoniae cpoA mutants
Source: PubMed Central journal article supplement (PMC3901891; doi:10.1186/1471-2180-14-12), 2014-01-20
Supplement: 1471-2180-14-12-S1.pdf [file 1471-2180-14-12-S1.pdf]

Supplement Fig. 1

Meiers et al.



Supplement Fig. 2

Meiers et al.
